# Supplementary material
Source: Royal Society of Chemistry journal article supplement (doi:10.1039/d6tc00154h)
Supplement: d6tc00154h1.pdf [file d6tc00154h1.pdf]

## Supporting Information

# Ultrahigh Responsivity UV Photodetector Enabled by Spatially Confined 2D $\beta$ -Ga<sub>2</sub>O<sub>3</sub>/PdSe<sub>2</sub> van der Waals Heterojunction

Ruan Zhang,<sup>a</sup> Xianyu Hu,<sup>b</sup> Yunlei Zhong,<sup>b</sup> Xianming Li,<sup>c</sup> Yong Zhang,<sup>b</sup> Youchao Kong<sup>d,\*</sup>  
Xiyuan Feng<sup>c,\*</sup>

<sup>a</sup>School of Electronic and Information Engineering, Suzhou Polytechnic University, Suzhou 215104, China

<sup>b</sup>Advanced Materials Division, Suzhou Institute of Nano-Tech and Nano-Bionics, Chinese Academy of Sciences, Suzhou 215123, China

<sup>c</sup>School of Integrated Circuits (School of Microelectronics), Northwestern Polytechnical University, No. 1 Dongxiang Road, Chang'an District, Xi'an 710129, P. R. China

<sup>d</sup>Department of Physics and Electronic Engineering, Yancheng Teachers University, Yancheng, P.R. China

\*Authors to whom correspondence should be addressed: [fengxy@nwpu.edu.cn](mailto:fengxy@nwpu.edu.cn)  
[kongyc@yctu.edu.cn](mailto:kongyc@yctu.edu.cn)

### S1: Raman spectra of pure $\beta$ -Ga<sub>2</sub>O<sub>3</sub>, pure PdSe<sub>2</sub> and the heterojunction.

As illustrated in Fig.S1, the Raman spectrum of the  $\beta$ -Ga<sub>2</sub>O<sub>3</sub>/PdSe<sub>2</sub> heterojunction overlapping region is essentially consistent with that of the pure PdSe<sub>2</sub>. Specifically, the characteristic A<sub>1g</sub> (176 cm<sup>-1</sup>), B<sub>1g</sub> (210 cm<sup>-1</sup>), and A<sub>2g</sub> (303 cm<sup>-1</sup>) vibrational modes of PdSe<sub>2</sub> remain well-resolved, showing no obvious peak shift or broadening compared to the pure component. In contrast, the characteristic Raman peaks of  $\beta$ -Ga<sub>2</sub>O<sub>3</sub> in the heterojunction region are almost undetectable. This phenomenon likely originates from two core factors and reveals critical interfacial properties of the  $\beta$ -Ga<sub>2</sub>O<sub>3</sub>/PdSe<sub>2</sub> van der Waals heterojunction:

(1) Weak interfacial interaction without chemical bonding: The negligible variation in PdSe<sub>2</sub>'s Raman peaks indicates that the formation of the heterojunction does not induce obvious lattice distortion or strong chemical bonding at the interface. The intrinsic crystal structure of PdSe<sub>2</sub> is well preserved—a hallmark of high-quality van der Waals heterojunctions dominated by weak van der Waals forces. This avoids the generation of interfacial defect states caused by chemical bonding or lattice mismatch, laying a solid foundation for efficient carrier transport;

(2) Optical absorption dominance of PdSe<sub>2</sub>: The undetectable Raman peaks of  $\beta$ -Ga<sub>2</sub>O<sub>3</sub> in the heterojunction region are mainly attributed to the higher optical absorption coefficient of PdSe<sub>2</sub> at the 532 nm excitation wavelength (used for Raman testing) compared to  $\beta$ -Ga<sub>2</sub>O<sub>3</sub>. The incident laser is predominantly absorbed by the PdSe<sub>2</sub> layer, leading to the suppression of  $\beta$ -Ga<sub>2</sub>O<sub>3</sub>'s Raman signal. This is a common optical phenomenon in van der Waals heterostructures with asymmetric optical absorption, rather than a reflection of the interfacial coupling strength<sup>[1]</sup>.

Notably, the weak van der Waals interfacial interaction observed in Raman characterization is fully consistent with the atomically sharp, defect-free interface revealed by cross-sectional STEM

imaging (Fig. 2a). This clean interface minimizes trap-assisted recombination and provides a smooth channel for carrier transfer, which is directly verified by the device's ultralow dark current and high photo-to-dark current ratio.

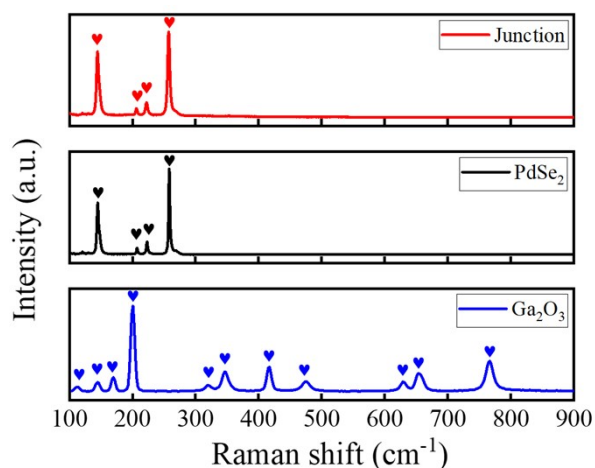

Fig. S1 Raman spectra of  $\beta$ -Ga<sub>2</sub>O<sub>3</sub>, PdSe<sub>2</sub> and the junction.

## S2: Performance comparison of representative $\beta$ -Ga<sub>2</sub>O<sub>3</sub>-based photodetectors operating in photoconductive mode.

Table S1 Performance comparison of representative  $\beta$ -Ga<sub>2</sub>O<sub>3</sub>-based photodetectors operating in photoconductive mode.

| Device                                                                    | Bias (V) | Responsivity (A/W) | Photo-to dark current ratio | Reference |
|---------------------------------------------------------------------------|----------|--------------------|-----------------------------|-----------|
| MSM $\beta$ -Ga <sub>2</sub> O <sub>3</sub> micro-flake                   | 30       | 1.68               | $1.37 \times 10^3$          | [2]       |
| MSM $\beta$ -Ga <sub>2</sub> O <sub>3</sub> films                         | 5        | 14.09              | $4.9 \times 10^4$           | [3]       |
| $\beta$ -Ga <sub>2</sub> O <sub>3</sub> /Nb <sub>2</sub> C                | 5        | 28                 | 213                         | [4]       |
| $\beta$ -Ga <sub>2</sub> O <sub>3</sub> /NSTO                             | -10      | 43.31              | 20                          | [5]       |
| $\beta$ -Ga <sub>2</sub> O <sub>3</sub> /MoS <sub>2</sub>                 | -10      | 0.00721            | $10^3$                      | [6]       |
| $\beta$ -Ga <sub>2</sub> O <sub>3</sub> /CsCu <sub>2</sub> I <sub>3</sub> | -1       | 178.9              | $5.4 \times 10^4$           | [7]       |
| $\beta$ -Ga <sub>2</sub> O <sub>3</sub> /Graphene                         | -10      | 14.5               | $3.3 \times 10^3$           | [8]       |
| $\beta$ -Ga <sub>2</sub> O <sub>3</sub> /PdSe <sub>2</sub>                | 5        | $6.17 \times 10^4$ | $2.5 \times 10^6$           | Our work  |

References:

- 1 Y.T. Chu, P.L. Chen, S.H. Huang, S.N.S. Yadav, W.R. Syong, C.H. Mao, Y.J. Lu, C.H. Liu, P.C. Wu, T.J. Yen, *ACS Nano*, 2025, **19**, 18545-18555.
- 2 S. Oh, M.A. Mastro, M.J. Tadjer, J. Kim, *ECS J. Solid State Sci. Technol.*, 2017, **6**, Q79-Q83.
- 3 D.-Y. Lin, D.N. Feria, S.-X. Lin, H.-C. Hsu, X.-B. Yang, T.-Y. Lin, *Mater. Today Commun.*, 2025, **45**, 112114.
- 4 Y. Zhang, S. Liu, R. Xu, S. Ruan, C. Liu, Y. Ma, X. Li, Y. Chen, J. Zhou, *Nanotechnology*, 2024, **35**, 165502.
- 5 D. Guo, H. Liu, P. Li, Z. Wu, S. Wang, C. Cui, C. Li, W. Tang, *ACS Appl. Mater. Interfaces*, 2017, **9**, 1619-1628.
- 6 M. Sharma, A. Singh, A. Kapoor, A. Singh, B.R. Tak, S. Kaushik, S. Bhattacharya, R. Singh, *ACS Appl. Electron. Mater.*, 2023, **5**, 2296-2308.

- 7 Y. Chen, Y. Li, Y. Yang, X. Yang, C. Shan, G. Shen, *Nano Energ.*, 2025, **138**, 110833.
- 8 M. Labeled, B.I. Park, J. Kim, J.H. Park, J.Y. Min, H.J. Hwang, J. Kim, Y.S. Rim, *ACS Nano*, 2024, **18**, 6558-6569.
